# Supplementary material for: Photophysical and electrochemical properties of new ortho-metalated complexes of rhodium(iii) containing 2,2′-dipyridylketone and 2,2′-dipyridylamine. An experimental and theoretical study
Source: Royal Society of Chemistry journal article supplement (doi:10.1039/b703216a), 2007-01-01

### Supplementary Information

S<sub>1</sub> COSY of (1)

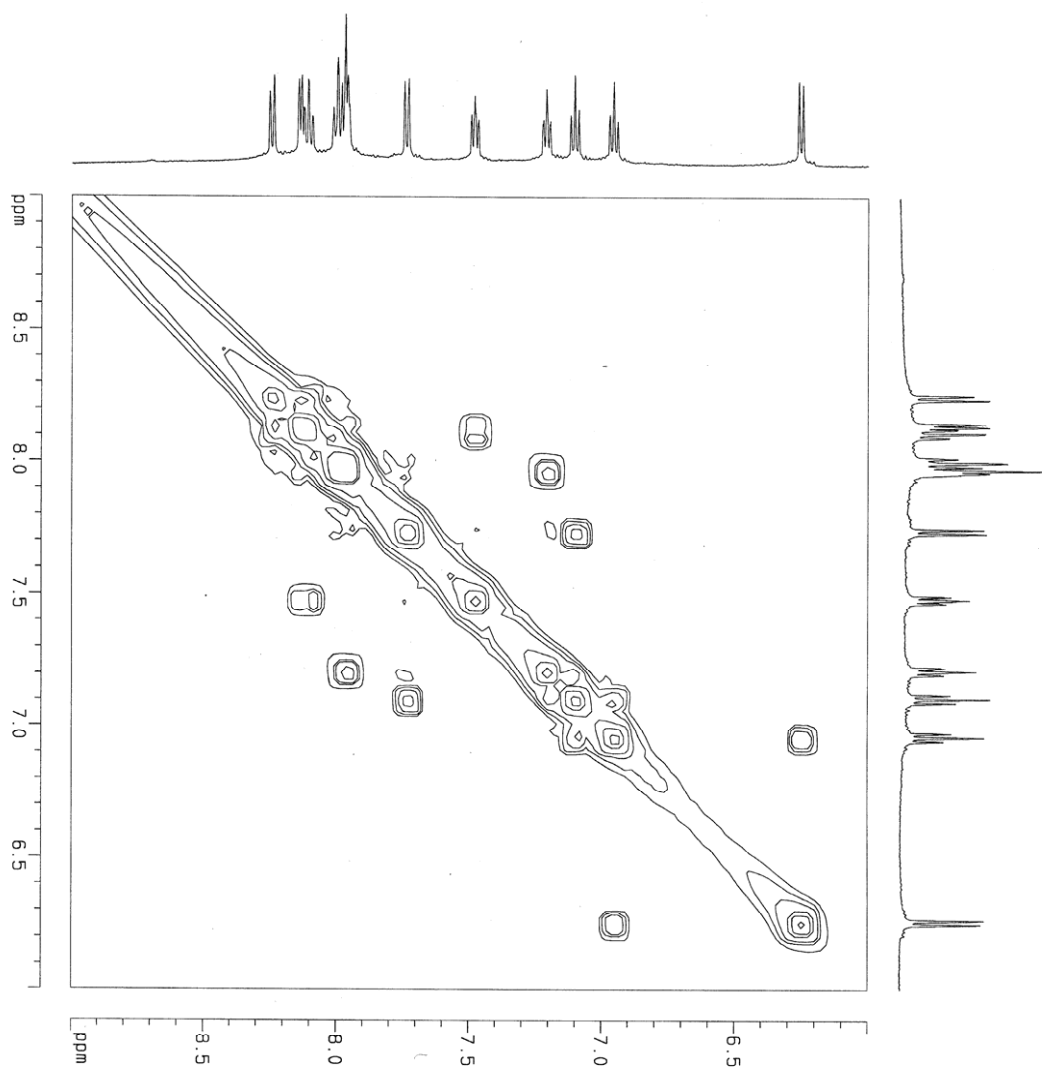

S<sub>2</sub> COSY of (2)

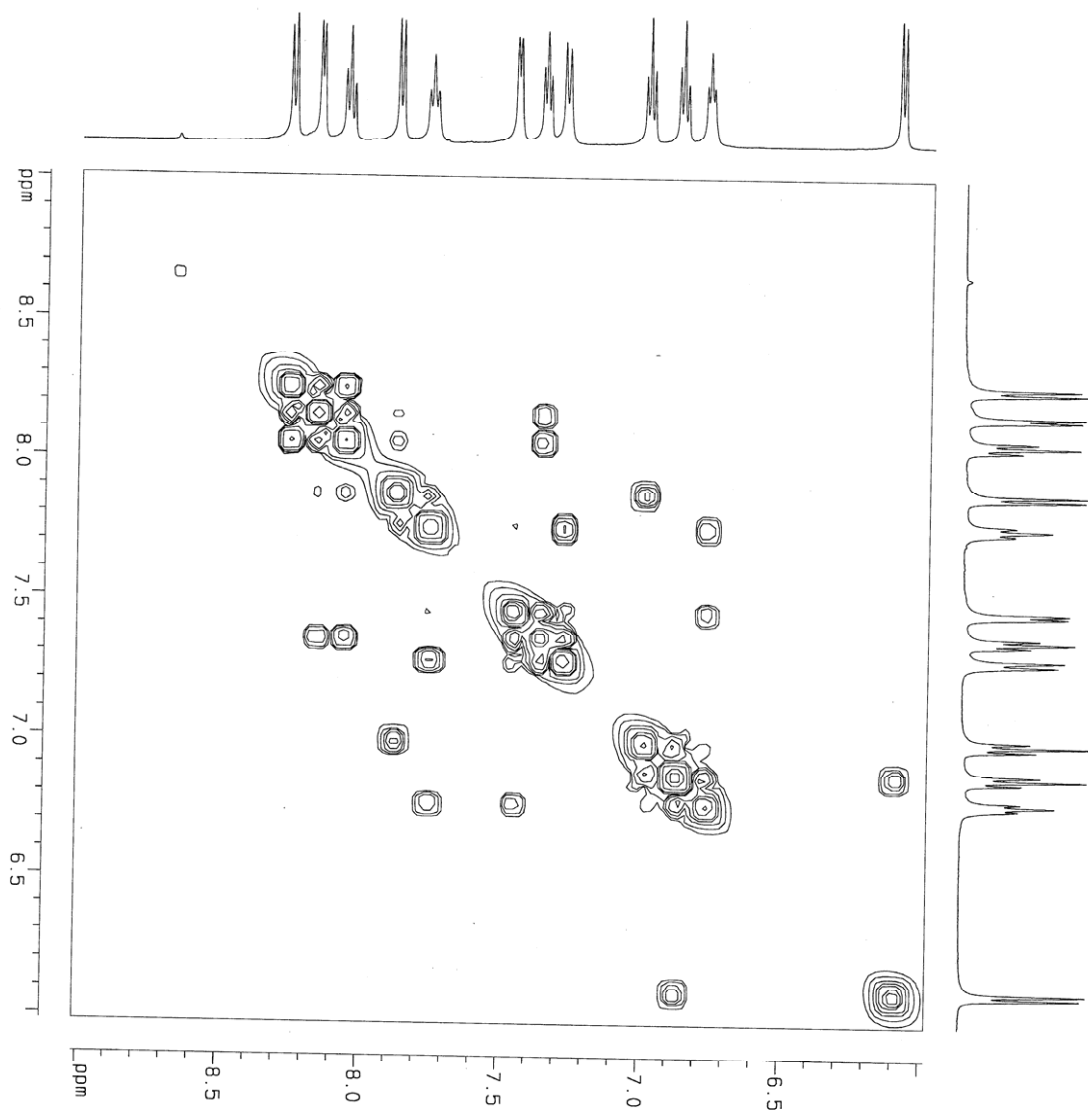

S<sub>3</sub> DFT (B3PW91) Optimized Geometry of (1) in XYZ Format

|    |              |              |              |
|----|--------------|--------------|--------------|
| Rh | 0.167520313  | 0.036939486  | -0.000731344 |
| N  | -1.071881811 | 1.019246256  | -1.344140575 |
| C  | 0.543582450  | 1.926630421  | 0.535447870  |
| N  | 1.576310008  | -0.774127356 | 1.283769976  |
| N  | -0.368869453 | -2.071344146 | -0.599153569 |
| N  | -1.614296109 | -0.115913058 | 1.403152551  |
| C  | 1.785952738  | 0.193135389  | -1.163194989 |
| C  | -1.785996028 | 0.432530301  | -2.317436353 |
| C  | -1.127426484 | 2.369322908  | -1.179682422 |
| C  | 1.437499835  | 2.372856693  | 1.512139571  |
| C  | -0.248988560 | 2.887364042  | -0.134599913 |
| C  | 2.851270901  | -0.772049036 | 0.804984586  |
| C  | 1.315892856  | -1.273267414 | 2.501640618  |
| C  | -1.608285114 | -2.593255261 | -0.521485246 |
| C  | 0.611437547  | -2.847735449 | -1.086311813 |
| C  | -1.648160096 | 0.716107668  | 2.455878947  |
| C  | -2.727079096 | -0.819239599 | 1.118923033  |
| C  | 2.984398743  | -0.249810368 | -0.552094481 |
| C  | 1.851503338  | 0.672536052  | -2.473217054 |
| C  | -1.958549885 | 3.136722863  | -2.005526252 |
| C  | -2.619804130 | 1.143718447  | -3.166701615 |
| C  | -0.153421707 | 4.248068184  | 0.192760052  |
| C  | 1.529915732  | 3.730148818  | 1.831776178  |
| C  | 2.306272450  | -1.780417031 | 3.328430475  |
| C  | 3.892737817  | -1.267138968 | 1.601194390  |
| C  | 0.412182709  | -4.162962004 | -1.494045574 |
| C  | -1.893671289 | -3.898979483 | -0.934973177 |
| C  | -3.900277503 | -0.692397813 | 1.869989368  |
| C  | -2.767017149 | 0.875992194  | 3.268267552  |
| C  | 3.065552841  | 0.706738967  | -3.162015282 |
| C  | 4.202001068  | -0.210735365 | -1.250278638 |
| H  | -1.666589212 | -0.640032806 | -2.418168757 |
| H  | 2.077540964  | 1.668870319  | 2.036351556  |
| H  | 0.957157130  | 1.031606614  | -2.972952675 |
| H  | 0.276149145  | -1.256410823 | 2.807386743  |
| H  | 1.589020346  | -2.384120309 | -1.162581659 |
| H  | -0.742886270 | 1.286617231  | 2.636381468  |
| C  | -2.791517890 | -1.806745266 | -0.015702851 |
| C  | -2.710366088 | 2.525416153  | -2.997873333 |
| C  | 0.732444801  | 4.669161534  | 1.176614005  |
| C  | 3.623047315  | -1.768095354 | 2.865921948  |
| C  | -0.867499749 | -4.701972360 | -1.417834992 |
| C  | -3.921388019 | 0.162158984  | 2.965579536  |
| C  | 4.242739977  | 0.267840834  | -2.552870082 |
| H  | -3.178047047 | 0.623696492  | -3.937580750 |
| H  | -0.765474596 | 4.986218107  | -0.318927625 |
| H  | -2.004169701 | 4.211533054  | -1.871498435 |
| H  | 2.234100686  | 4.055754705  | 2.593737116  |
| H  | 3.093353600  | 1.084165339  | -4.181386322 |
| H  | 5.121283716  | -0.552935536 | -0.782015044 |
| H  | 4.909308532  | -1.255615936 | 1.224514167  |
| H  | 2.048717175  | -2.170902785 | 4.307094194  |
| H  | 1.250686001  | -4.740185597 | -1.870391784 |
| H  | -2.915594726 | -4.254773272 | -0.871403069 |
| H  | -2.724210996 | 1.558484488  | 4.111105572  |
| H  | -4.769601048 | -1.269703113 | 1.576869248  |
| O  | -3.889346207 | -2.092402261 | -0.464416418 |

Supplementary material (ESI) for Dalton Transactions  
This journal is © The Royal Society of Chemistry 2007

|   |              |              |              |
|---|--------------|--------------|--------------|
| H | -3.353651619 | 3.119905609  | -3.640234324 |
| H | 0.807173284  | 5.723429554  | 1.426501391  |
| H | 5.185163140  | 0.300459872  | -3.091609837 |
| H | 4.429701034  | -2.149439252 | 3.485482140  |
| H | -1.065820238 | -5.722239424 | -1.732899018 |
| H | -4.819698165 | 0.267628716  | 3.566844492  |

S<sub>4</sub> DFT (B3PW91) Optimized Geometry of (2) in XYZ Format

|    |             |             |             |
|----|-------------|-------------|-------------|
| Rh | 0.07336407  | -0.03460061 | -0.00918780 |
| N  | -1.33512588 | -0.69505698 | 1.36049184  |
| C  | -0.14733366 | -1.91187980 | -0.65688857 |
| C  | 1.62705042  | -0.73961329 | 1.03085310  |
| N  | 1.59408047  | 0.42426908  | -1.33710299 |
| N  | -1.63905834 | 0.75769141  | -1.27254209 |
| N  | 0.20730638  | 2.08829178  | 0.76327615  |
| C  | -1.76315918 | -1.97205030 | 1.16447646  |
| C  | -1.81693049 | 0.02493168  | 2.38472910  |
| C  | 0.50627457  | -2.52570459 | -1.72853186 |
| C  | -1.12570822 | -2.65647479 | 0.04337856  |
| C  | 2.87769603  | -0.58336833 | 0.38454517  |
| C  | 1.60889037  | -1.33066907 | 2.29628739  |
| C  | 1.42774475  | 1.03943947  | -2.51752541 |
| C  | 2.83935109  | 0.05632773  | -0.92788399 |
| C  | -2.37267871 | 1.83047176  | -0.94741496 |
| C  | -2.06150814 | -0.00439329 | -2.30572050 |
| C  | -0.77871218 | 2.99271741  | 0.67664981  |
| C  | 1.35409340  | 2.46252891  | 1.36943311  |
| C  | -2.76504492 | -0.47137157 | 3.26618064  |
| C  | -2.72537265 | -2.52241818 | 2.02114743  |
| C  | -1.43671662 | -3.96951828 | -0.33997712 |
| C  | 0.19294543  | -3.83447902 | -2.10451311 |
| C  | 2.79234249  | -1.74863736 | 2.90803732  |
| C  | 4.06381717  | -1.00609985 | 1.00519973  |
| C  | 3.94433610  | 0.31221014  | -1.75036785 |
| C  | 2.48534809  | 1.31825685  | -3.36956142 |
| C  | -3.21515679 | 0.24369954  | -3.02601325 |
| C  | -3.56786732 | 2.14818095  | -1.62198552 |
| C  | 1.55769885  | 3.70983069  | 1.93121700  |
| C  | -0.65378627 | 4.28451209  | 1.22306401  |
| N  | -2.00123334 | 2.67962611  | 0.08956962  |
| H  | 2.12325398  | 1.69954564  | 1.41159549  |
| H  | 0.66908116  | -1.47673808 | 2.82021090  |
| H  | 0.40862317  | 1.30732287  | -2.77193748 |
| H  | 1.27275539  | -1.99204653 | -2.28328219 |
| H  | -1.41024195 | 1.02319910  | 2.49567983  |
| H  | -1.43520848 | -0.86012850 | -2.53409824 |
| C  | -3.23004965 | -1.77263557 | 3.07277419  |
| C  | -0.77968243 | -4.55805520 | -1.41313055 |
| C  | 4.02132500  | -1.58852646 | 2.26491343  |
| C  | 3.76941202  | 0.94115646  | -2.97401246 |
| C  | -3.99278973 | 1.34590236  | -2.66293049 |
| C  | 0.52000928  | 4.64152830  | 1.85936668  |
| H  | 2.50055505  | 3.94087859  | 2.41453412  |
| H  | -1.47150132 | 4.99412771  | 1.12959729  |
| H  | 2.75432528  | -2.20681968 | 3.89348113  |
| H  | 5.02344525  | -0.88435015 | 0.50942048  |
| H  | 4.93524666  | 0.01382800  | -1.42713649 |
| H  | 0.71670197  | -4.29318863 | -2.93987076 |
| H  | 2.30257654  | 1.81509284  | -4.31633434 |
| H  | -2.19160290 | -4.53966449 | 0.19528490  |
| H  | -3.06656888 | -3.53917308 | 1.86288671  |
| H  | -3.12152403 | 0.14625668  | 4.08360277  |
| H  | -2.67787303 | 3.41835119  | 0.22404718  |
| H  | -4.13974328 | 3.02463092  | -1.32900648 |
| H  | -3.49942829 | -0.41331482 | -3.84055201 |

Supplementary material (ESI) for Dalton Transactions  
This journal is © The Royal Society of Chemistry 2007

|   |             |             |             |
|---|-------------|-------------|-------------|
| H | 0.62936761  | 5.63539247  | 2.28355989  |
| H | 4.93878184  | -1.91824346 | 2.74357079  |
| H | 4.62485510  | 1.13723785  | -3.61413089 |
| H | -1.01972335 | -5.57573731 | -1.70682133 |
| H | -3.97282089 | -2.19943355 | 3.74071845  |
| H | -4.91152902 | 1.58145593  | -3.19219264 |

S<sub>5</sub> Frontier Orbitals of (1) and Their Composition (H=HOMO, L=LUMO, L+1=LUMO+1, etc.)

| Orbital | <i>E</i> (eV) | Rh % | dpk % | ppy      |           |
|---------|---------------|------|-------|----------|-----------|
|         |               |      |       | phenyl % | pyridyl % |
| L+9     | -2.54         | 28.7 | 9.3   | 56.7     | 5.3       |
| L+8     | -3.08         | 50.7 | 3.6   | 19.6     | 26.1      |
| L+7     | -3.55         | 0.6  | 63.1  | 5.1      | 31.1      |
| L+6     | -3.58         | 0.6  | 36.1  | 6.8      | 56.4      |
| L+5     | -3.67         | 2.1  | 10.5  | 13.2     | 74.2      |
| L+4     | -4.04         | 1.6  | 85.8  | 0.9      | 11.7      |
| L+3     | -4.12         | 1.2  | 43.5  | 14.4     | 40.9      |
| L+2     | -4.20         | 3.6  | 45.4  | 13.0     | 38.1      |
| L+1     | -4.25         | 4.4  | 13.4  | 23.5     | 58.7      |
| L       | -5.46         | 0.9  | 97.8  | 0.2      | 1.0       |
| H       | -8.42         | 30.5 | 1.5   | 56.9     | 11.1      |
| H-1     | -8.69         | 1.9  | 1.6   | 74.6     | 22.0      |
| H-2     | -8.95         | 6.3  | 0.7   | 76.7     | 16.4      |
| H-3     | -9.03         | 3.7  | 1.9   | 84.3     | 10.0      |
| H-4     | -9.47         | 70.4 | 3.6   | 9.8      | 16.3      |
| H-5     | -9.52         | 70.0 | 5.2   | 8.5      | 16.3      |
| H-6     | -9.95         | 6.9  | 65.7  | 26.4     | 1.0       |
| H-7     | -10.09        | 19.6 | 17.5  | 60.4     | 2.4       |
| H-8     | -10.31        | 5.2  | 79.2  | 13.0     | 2.7       |
| H-9     | -10.51        | 13.4 | 66.4  | 14.9     | 5.3       |

S<sub>6</sub> Frontier Orbitals of (2) and Their Composition (H=HOMO, L=LUMO, L+1=LUMO+1, etc.)

| Orbital | <i>E</i> (eV) | Rh % | HDP A % | ppy      |           |
|---------|---------------|------|---------|----------|-----------|
|         |               |      |         | phenyl % | pyridyl % |
| L+9     | -2.39         | 27.3 | 10.1    | 57.7     | 4.8       |
| L+8     | -2.65         | 5.9  | 89.3    | 1.6      | 3.2       |
| L+7     | -2.91         | 47.7 | 7.8     | 19.7     | 24.8      |
| L+6     | -3.44         | 1.3  | 1.3     | 10.6     | 86.8      |
| L+5     | -3.47         | 0.1  | 97.9    | 0.7      | 1.3       |
| L+4     | -3.54         | 2.0  | 8.5     | 13.5     | 76.1      |
| L+3     | -3.88         | 1.7  | 86.4    | 0.5      | 11.4      |
| L+2     | -4.01         | 2.6  | 13.1    | 20.9     | 63.3      |
| L+1     | -4.08         | 3.5  | 13.3    | 23.9     | 59.2      |
| L       | -4.12         | 2.7  | 77.8    | 5.4      | 14.1      |
| H       | -8.26         | 32.3 | 2.4     | 55.1     | 10.3      |
| H-1     | -8.56         | 2.0  | 1.3     | 75.5     | 21.2      |
| H-2     | -8.82         | 6.8  | 1.4     | 75.3     | 16.5      |
| H-3     | -8.90         | 7.2  | 6.1     | 77.4     | 9.4       |
| H-4     | -8.94         | 10.6 | 75.8    | 10.5     | 3.0       |
| H-5     | -9.28         | 70.3 | 4.1     | 10.3     | 15.3      |
| H-6     | -9.40         | 57.6 | 21.5    | 7.0      | 13.8      |
| H-7     | -9.97         | 19.9 | 15.9    | 61.8     | 2.5       |
| H-8     | -10.01        | 15.2 | 34.3    | 48.1     | 2.5       |
| H-9     | -10.41        | 32.7 | 7.4     | 31.0     | 28.9      |

S<sub>7</sub> Complete Listing of TD-DFT Calculated Singlet Excited States of (1) at B3PW91 Level

| #  | (eV) | (nm)  | (f)    | (Assignment; H=HOMO, L=LUMO, L+1=LUMO+1, etc.)              |
|----|------|-------|--------|-------------------------------------------------------------|
| 1  | 2.37 | 523.6 | 0.0065 | H→L (+98%)                                                  |
| 2  | 2.71 | 456.8 | 0.0030 | H-1→L (+98%)                                                |
| 3  | 2.99 | 414.3 | 0.0020 | H-2→L (+97%)                                                |
| 4  | 3.05 | 406.3 | 0.0022 | H-3→L (+89%)                                                |
| 5  | 3.26 | 380.4 | 0.0015 | H-6→L (15%), H-4→L (+74%)                                   |
| 6  | 3.31 | 374.5 | 0.0039 | H-6→L (+43%), H-4→L (+23%)                                  |
| 7  | 3.36 | 369.2 | 0.0154 | H-5→L (+84%)                                                |
| 8  | 3.43 | 362.0 | 0.0364 | H→L+1 (+90%)                                                |
| 9  | 3.52 | 352.8 | 0.0015 | H→L+2 (+86%)                                                |
| 10 | 3.65 | 340.1 | 0.0081 | H→L+3 (+88%)                                                |
| 11 | 3.75 | 330.5 | 0.0081 | H→L+4 (+92%)                                                |
| 12 | 3.84 | 323.1 | 0.0058 | H-1→L+1 (+87%)                                              |
| 13 | 3.89 | 318.7 | 0.0275 | H-1→L+2 (+80%)                                              |
| 14 | 3.96 | 313.4 | 0.0068 | H-7→L (+89%)                                                |
| 15 | 4.01 | 309.0 | 0.0105 | H-1→L+3 (+75%)                                              |
| 16 | 4.02 | 308.8 | 0.0197 | H-8→L (+62%), H-6→L (17%)                                   |
| 17 | 4.05 | 306.1 | 0.0045 | H→L+5 (22%), H→L+8 (+47%)                                   |
| 18 | 4.08 | 303.6 | 0.0188 | H-2→L+1 (+21%), H→L+5 (+43%), H→L+8 (+18%)                  |
| 19 | 4.10 | 302.7 | 0.0018 | H-1→L+4 (+82%)                                              |
| 20 | 4.14 | 299.4 | 0.0302 | H-2→L+1 (+56%), H→L+5 (17%)                                 |
| 21 | 4.17 | 297.6 | 0.0146 | H-3→L+2 (13%), H-2→L+2 (+39%), H→L+6 (10%)                  |
| 22 | 4.17 | 297.2 | 0.0171 | H-3→L+1 (+22%), H-3→L+2 (11%), H→L+6 (+30%)                 |
| 23 | 4.19 | 296.2 | 0.0121 | H-3→L+2 (+15%), H-2→L+2 (+23%), H→L+6 (+14%)                |
| 24 | 4.23 | 293.2 | 0.0319 | H-3→L+1 (+38%), H→L+6 (14%)                                 |
| 25 | 4.27 | 290.4 | 0.0035 | H→L+6 (16%), H→L+7 (+69%)                                   |
| 26 | 4.28 | 289.6 | 0.0138 | H-2→L+3 (+60%)                                              |
| 27 | 4.30 | 288.2 | 0.0227 | H-4→L+2 (16%), H-4→L+8 (+27%), H-2→L+3 (12%)                |
| 28 | 4.32 | 286.8 | 0.0021 | H-3→L+2 (+22%), H-3→L+3 (+39%), H-2→L+4 (25%)               |
| 29 | 4.34 | 285.6 | 0.0472 | H-5→L+8 (+15%), H-3→L+2 (+16%), H-2→L+4 (+12%)              |
| 30 | 4.36 | 284.5 | 0.0101 | H-4→L+1 (+63%), H-3→L+3 (+10%)                              |
| 31 | 4.41 | 281.4 | 0.0152 | H-3→L+3 (+20%), H-2→L+4 (+48%)                              |
| 32 | 4.44 | 279.3 | 0.0120 | H-10→L (14%), H-9→L (11%), H-5→L+1 (+23%), H-1→L+5 (+10%)   |
| 33 | 4.45 | 278.8 | 0.0060 | H-10→L (+18%), H-9→L (+30%), H-5→L+1 (+12%), H-1→L+5 (+16%) |
| 34 | 4.47 | 277.6 | 0.0064 | H-5→L+1 (+15%), H-3→L+4 (+56%)                              |
| 35 | 4.47 | 277.3 | 0.0444 | H-13→L (+17%), H-9→L (10%), H-1→L+5 (+23%)                  |
| 36 | 4.49 | 276.2 | 0.0580 | H-13→L (13%), H-3→L+4 (+18%), H-1→L+5 (+12%)                |
| 37 | 4.54 | 272.9 | 0.0251 | H-4→L+3 (22%), H-1→L+6 (+29%)                               |
| 38 | 4.57 | 271.2 | 0.0086 | H-12→L (13%), H-10→L (+35%), H-4→L+3 (+13%)                 |
| 39 | 4.59 | 270.1 | 0.0013 | H-4→L+2 (10%), H→L+9 (+33%)                                 |
| 40 | 4.59 | 270.0 | 0.0198 | H-5→L+2 (10%), H-4→L+3 (+16%), H→L+9 (+23%)                 |
| 41 | 4.60 | 269.3 | 0.0072 | H-1→L+6 (21%), H-1→L+7 (+41%)                               |
| 42 | 4.62 | 268.5 | 0.0179 | H-5→L+3 (+15%), H-4→L+2 (11%), H-1→L+7 (+22%)               |
| 43 | 4.64 | 267.5 | 0.0561 | H-5→L+2 (+27%), H-5→L+3 (+19%), H-2→L+5 (11%)               |
| 44 | 4.67 | 265.3 | 0.0494 | H-5→L+3 (+26%), H-1→L+6 (10%), H-1→L+7 (11%)                |
| 45 | 4.71 | 263.1 | 0.0197 | H-11→L (+29%), H-4→L+4 (+51%)                               |
| 46 | 4.73 | 262.3 | 0.0274 | H-13→L (+11%), H-11→L (+35%), H-4→L+4 (31%)                 |
| 47 | 4.74 | 261.6 | 0.0245 | H-2→L+5 (+15%), H-1→L+8 (+55%)                              |
| 48 | 4.76 | 260.2 | 0.0161 | H-13→L (13%), H-12→L (+43%), H-5→L+4 (22%), H-2→L+5 (+10%)  |
| 49 | 4.78 | 259.3 | 0.0405 | H-12→L (+13%), H-5→L+4 (+24%), H-2→L+5 (11%)                |
| 50 | 4.80 | 258.1 | 0.0145 | H-5→L+4 (+30%), H-3→L+5 (24%)                               |



S<sub>8</sub> Complete Listing of TD-DFT Calculated Singlet Excited States of (2) at B3PW91 Level

| #  | (eV) | (nm)  | (f)    | (Assignment; H=HOMO, L=LUMO, L+1=LUMO+1, etc.)                 |
|----|------|-------|--------|----------------------------------------------------------------|
| 1  | 3.40 | 364.7 | 0.0334 | H→L (+75%), H→L+1 (+16%)                                       |
| 2  | 3.47 | 357.3 | 0.0035 | H→L (14%), H→L+1 (+72%)                                        |
| 3  | 3.57 | 347.1 | 0.0043 | H→L+2 (+85%)                                                   |
| 4  | 3.74 | 331.1 | 0.0072 | H→L+3 (+93%)                                                   |
| 5  | 3.84 | 322.6 | 0.0027 | H-1→L (+76%), H-1→L+1 (+11%)                                   |
| 6  | 3.88 | 319.5 | 0.0215 | H-1→L+1 (+68%), H-1→L+2 (+14%)                                 |
| 7  | 3.97 | 312.2 | 0.0126 | H-1→L (+10%), H-1→L+1 (11%), H-1→L+2 (+71%)                    |
| 8  | 4.04 | 306.6 | 0.0077 | H-3→L (12%), H→L+4 (+31%), H→L+7 (+30%)                        |
| 9  | 4.05 | 306.5 | 0.0093 | H→L+4 (+49%), H→L+7 (20%)                                      |
| 10 | 4.08 | 303.7 | 0.0133 | H-4→L (10%), H-3→L (15%), H-3→L+1 (+19%), H-2→L (+10%)         |
| 11 | 4.11 | 302.0 | 0.0047 | H-1→L+3 (+54%), H→L+5 (+18%), H→L+6 (13%)                      |
| 12 | 4.12 | 301.0 | 0.0138 | H-5→L (10%), H-2→L (+52%)                                      |
| 13 | 4.15 | 299.0 | 0.0060 | H-2→L+1 (12%), H-1→L+3 (+14%), H→L+6 (+35%)                    |
| 14 | 4.17 | 297.3 | 0.0014 | H-3→L (21%), H-2→L+1 (+14%), H→L+6 (+27%)                      |
| 15 | 4.17 | 297.2 | 0.0901 | H-4→L (+10%), H-3→L+2 (+15%), H-2→L+1 (+29%)                   |
| 16 | 4.20 | 295.1 | 0.0147 | H-1→L+3 (15%), H→L+5 (+47%)                                    |
| 17 | 4.22 | 293.7 | 0.0165 | H-3→L+1 (12%), H-3→L+2 (+13%), H-2→L+1 (12%), H-2→L+2 (+18%)   |
| 18 | 4.24 | 292.7 | 0.0191 | H-2→L+2 (36%), H→L+5 (10%)                                     |
| 19 | 4.27 | 290.6 | 0.0461 | H-4→L (+38%), H-3→L (13%), H→L+6 (10%)                         |
| 20 | 4.28 | 289.7 | 0.0102 | H-4→L+1 (+48%), H-3→L+1 (15%)                                  |
| 21 | 4.29 | 289.2 | 0.0096 | H-5→L (21%), H-5→L+7 (+20%)                                    |
| 22 | 4.33 | 286.3 | 0.0101 | H-5→L (+16%), H-4→L+2 (+33%), H-3→L+2 (13%)                    |
| 23 | 4.33 | 286.1 | 0.0624 | H-5→L (+12%), H-5→L+1 (+16%), H-2→L+3 (+10%), H-1→L+6 (+11%)   |
| 24 | 4.37 | 283.8 | 0.0166 | H-4→L+2 (+23%), H-4→L+3 (11%), H-3→L+3 (18%)                   |
| 25 | 4.40 | 281.5 | 0.0102 | H-3→L+2 (12%), H-2→L+3 (+38%)                                  |
| 26 | 4.42 | 280.3 | 0.0084 | H-5→L+2 (+19%), H-3→L+3 (+16%), H-2→L+3 (+24%)                 |
| 27 | 4.46 | 278.3 | 0.0289 | H-1→L+4 (+49%)                                                 |
| 28 | 4.50 | 275.6 | 0.0192 | H-6→L (+10%), H-5→L (17%), H-5→L+1 (+25%), H-5→L+2 (13%)       |
| 29 | 4.52 | 274.5 | 0.0153 | H-5→L+2 (10%), H-4→L+3 (+55%), H-3→L+3 (16%)                   |
| 30 | 4.52 | 274.3 | 0.0056 | H-6→L (+24%), H-6→L+1 (+12%), H-5→L+2 (+18%), H-3→L+3 (15%)    |
| 31 | 4.56 | 272.2 | 0.0253 | H-6→L+1 (+10%), H-1→L+5 (+22%), H-1→L+6 (17%), H→L+9 (17%)     |
| 32 | 4.56 | 271.9 | 0.0131 | H-1→L+5 (+56%), H→L+9 (+22%)                                   |
| 33 | 4.58 | 271.0 | 0.0402 | H-6→L+1 (+18%), H-1→L+5 (16%), H→L+9 (+21%)                    |
| 34 | 4.59 | 270.0 | 0.0250 | H-6→L (18%), H-6→L+2 (20%), H-1→L+6 (+24%)                     |
| 35 | 4.63 | 268.0 | 0.0339 | H-6→L+1 (+30%)                                                 |
| 36 | 4.66 | 265.9 | 0.0195 | H-6→L+2 (+33%), H-2→L+4 (20%), H-1→L+6 (+12%)                  |
| 37 | 4.70 | 264.0 | 0.0092 | H-5→L+3 (+72%)                                                 |
| 38 | 4.76 | 260.5 | 0.0920 | H-6→L+2 (10%), H-2→L+4 (30%), H-1→L+7 (+33%)                   |
| 39 | 4.77 | 259.9 | 0.0149 | H-3→L+4 (+54%), H-2→L+6 (17%)                                  |
| 40 | 4.80 | 258.4 | 0.0186 | H-3→L+6 (22%), H-2→L+4 (+13%), H-1→L+7 (+44%)                  |
| 41 | 4.83 | 256.7 | 0.0086 | H-4→L+4 (30%), H-2→L+5 (+58%)                                  |
| 42 | 4.84 | 256.4 | 0.0076 | H-6→L+3 (+15%), H-4→L+4 (+38%), H-2→L+5 (+12%), H-2→L+6 (+13%) |
| 43 | 4.86 | 255.0 | 0.0206 | H-6→L+3 (+49%), H-2→L+6 (20%)                                  |
| 44 | 4.87 | 254.8 | 0.0588 | H-6→L+3 (+18%), H-3→L+6 (+13%), H-2→L+6 (+21%)                 |
| 45 | 4.87 | 254.7 | 0.0869 | H-4→L+4 (+10%), H-4→L+6 (+12%), H-3→L+6 (+25%)                 |
| 46 | 4.89 | 253.4 | 0.1009 | H-3→L+5 (+74%)                                                 |
| 47 | 4.93 | 251.3 | 0.0467 | H-4→L+6 (+72%), H-3→L+6 (10%)                                  |
| 48 | 4.96 | 250.0 | 0.0745 | H-4→L+5 (+61%)                                                 |
| 49 | 4.99 | 248.2 | 0.0376 | H-7→L+1 (+40%), H-5→L+4 (+31%)                                 |
| 50 | 5.01 | 247.4 | 0.0084 | H-7→L+1 (20%), H-5→L+4 (+27%), HOMO→L+8 (+20%)                 |

S<sub>9</sub> Comparison of Experimental IR and DFT Calculated spectrum for (1)

Experimental

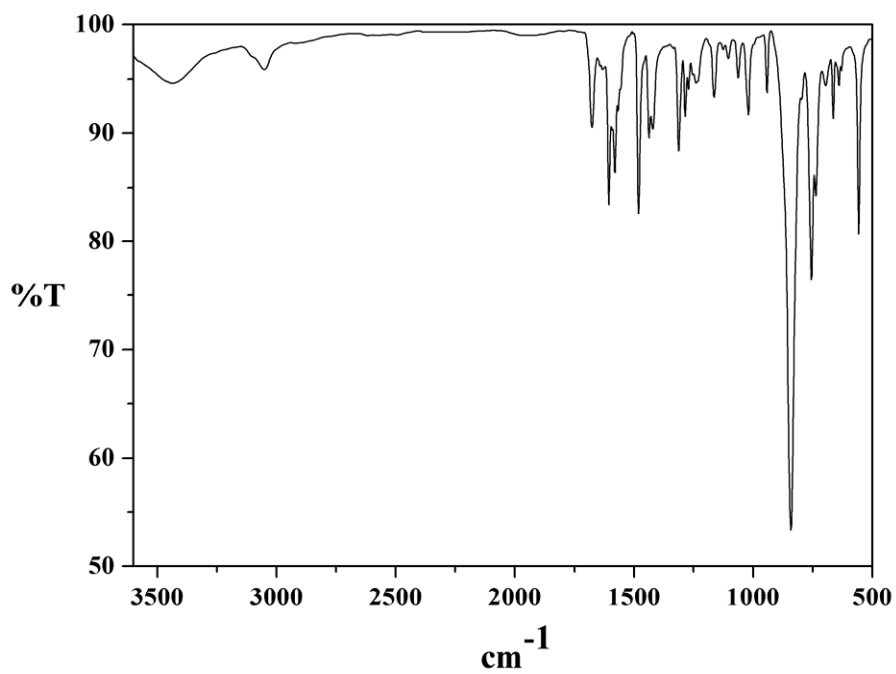

Calculated

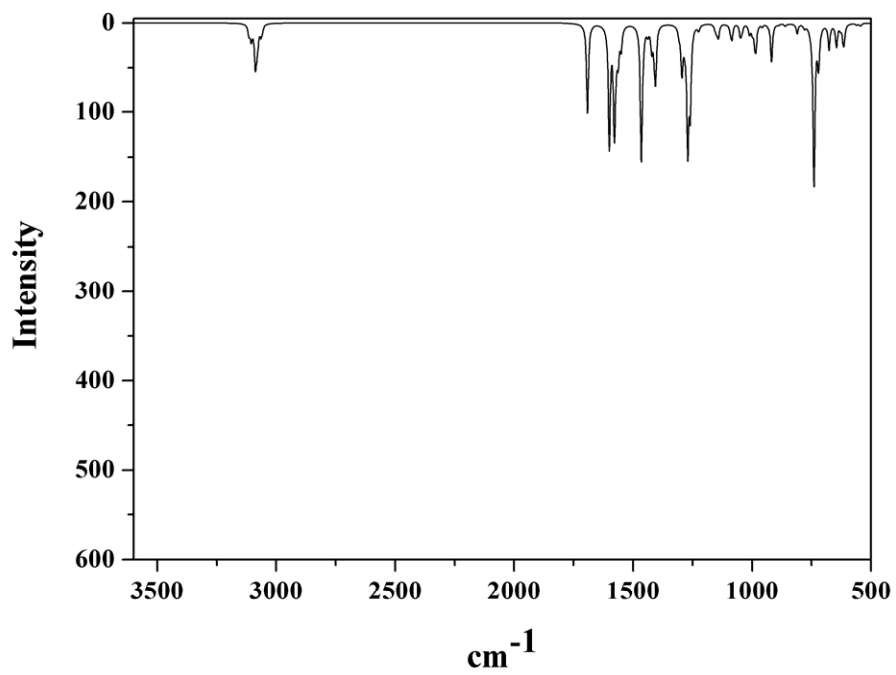

S<sub>10</sub> Comparison of Experimental IR and DFT Calculated spectrum for (2)

Experimental

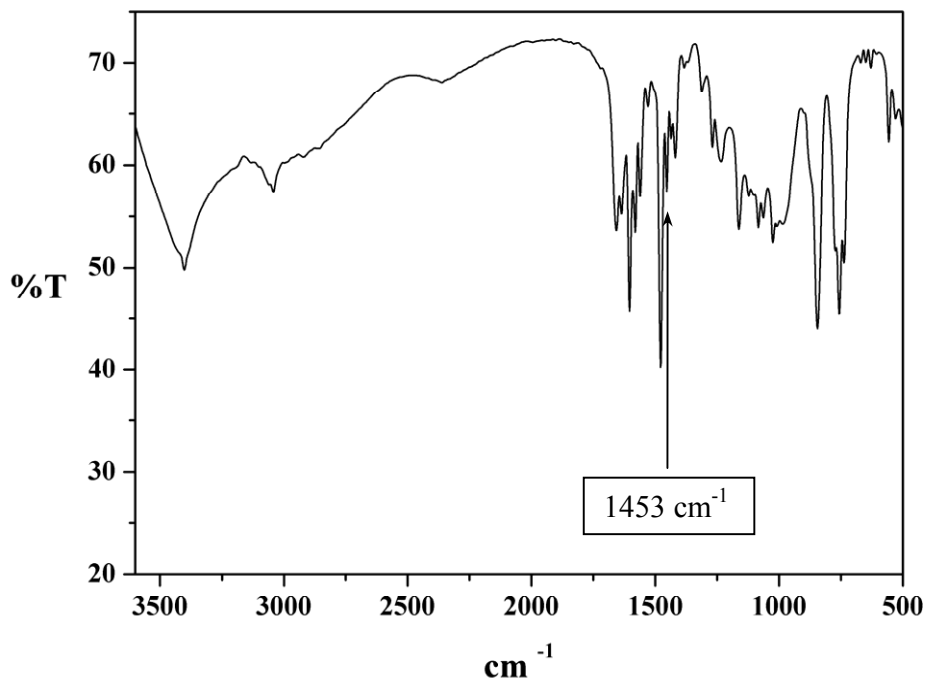

Calculated

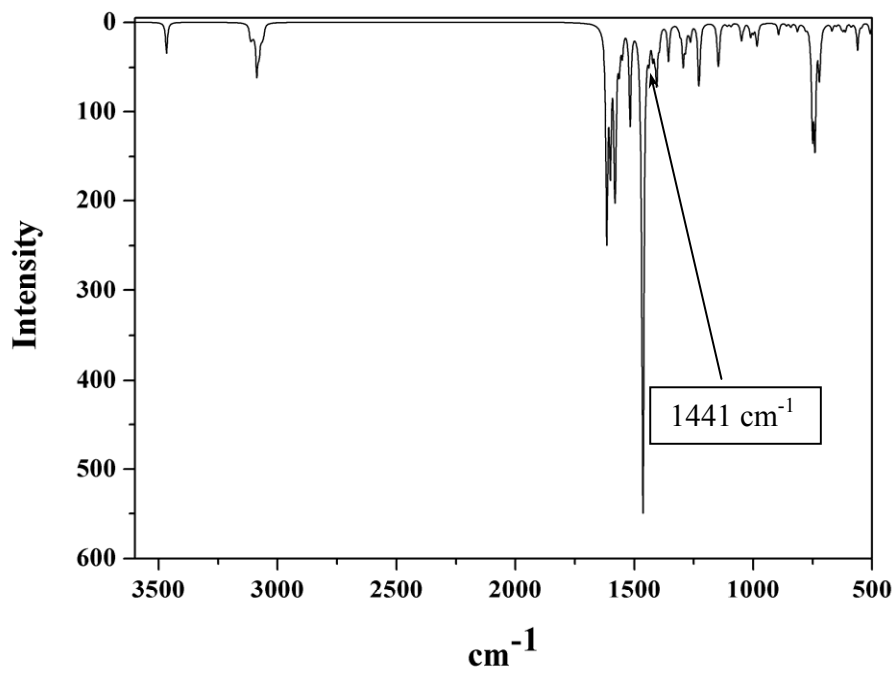

Supplement: b703216a.pdf [file b703216a.pdf]
